# Supplementary material for: Multi-transcriptomic analysis points to early organelle dysfunction in human astrocytes in Alzheimer’s disease
Source: bioRxiv or medRxiv preprint supplement (doi:10.1101/2021.02.25.21252422), 2021-07-30

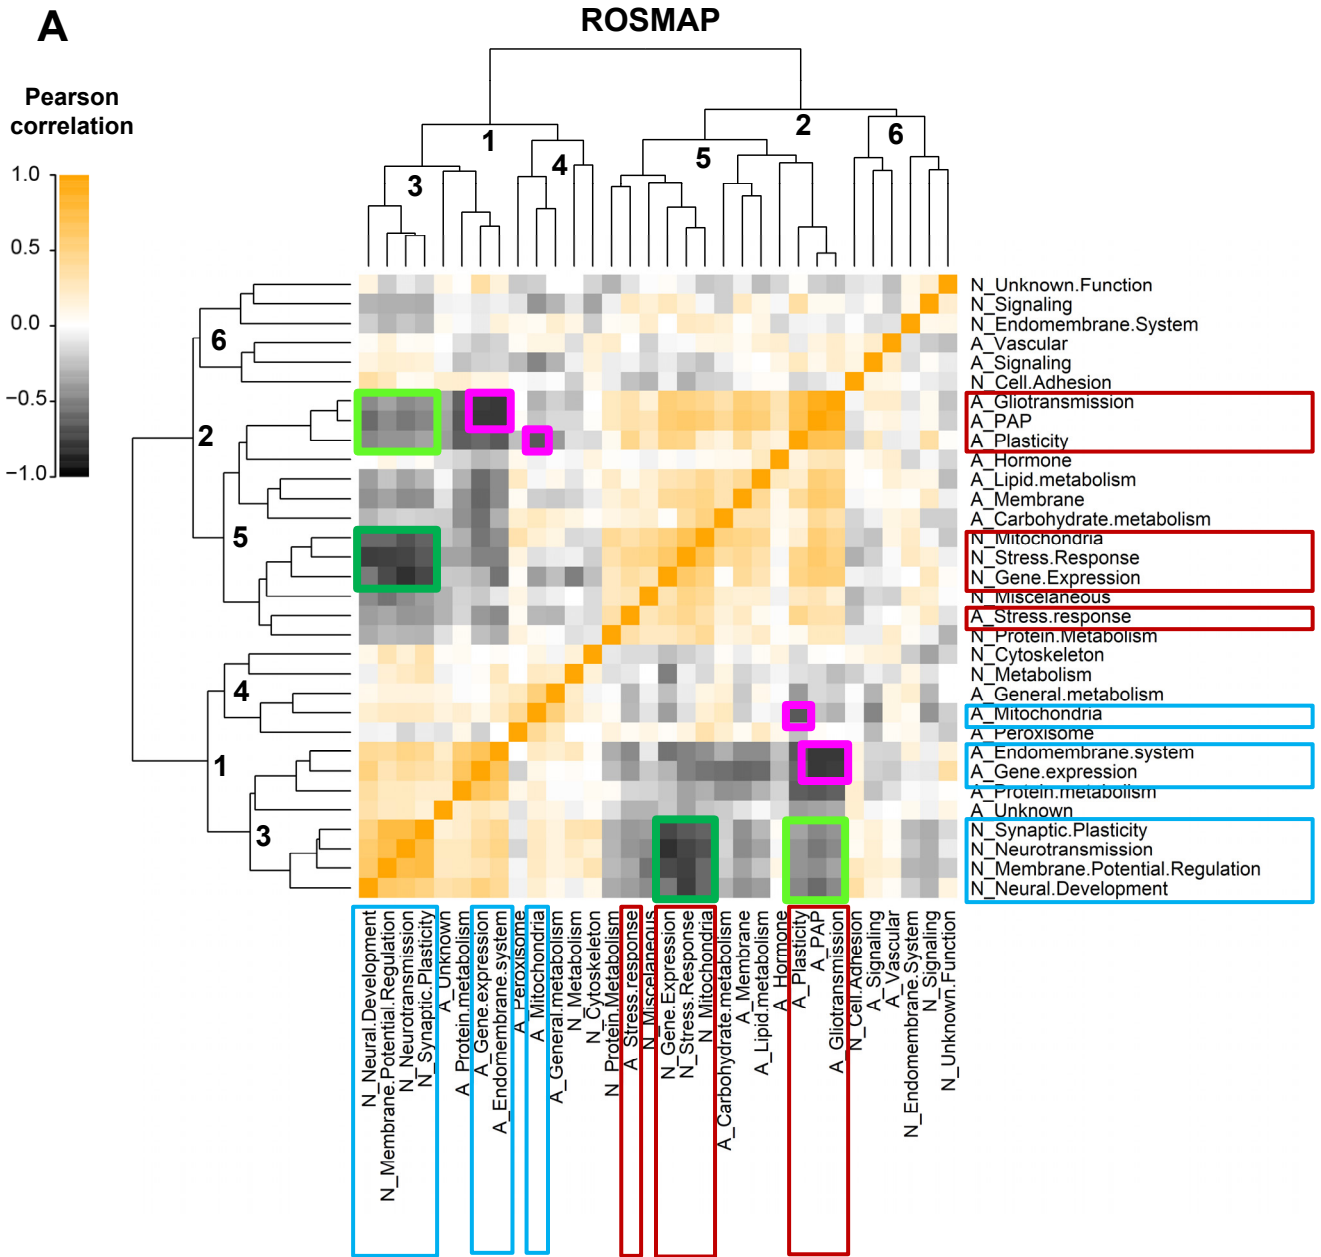

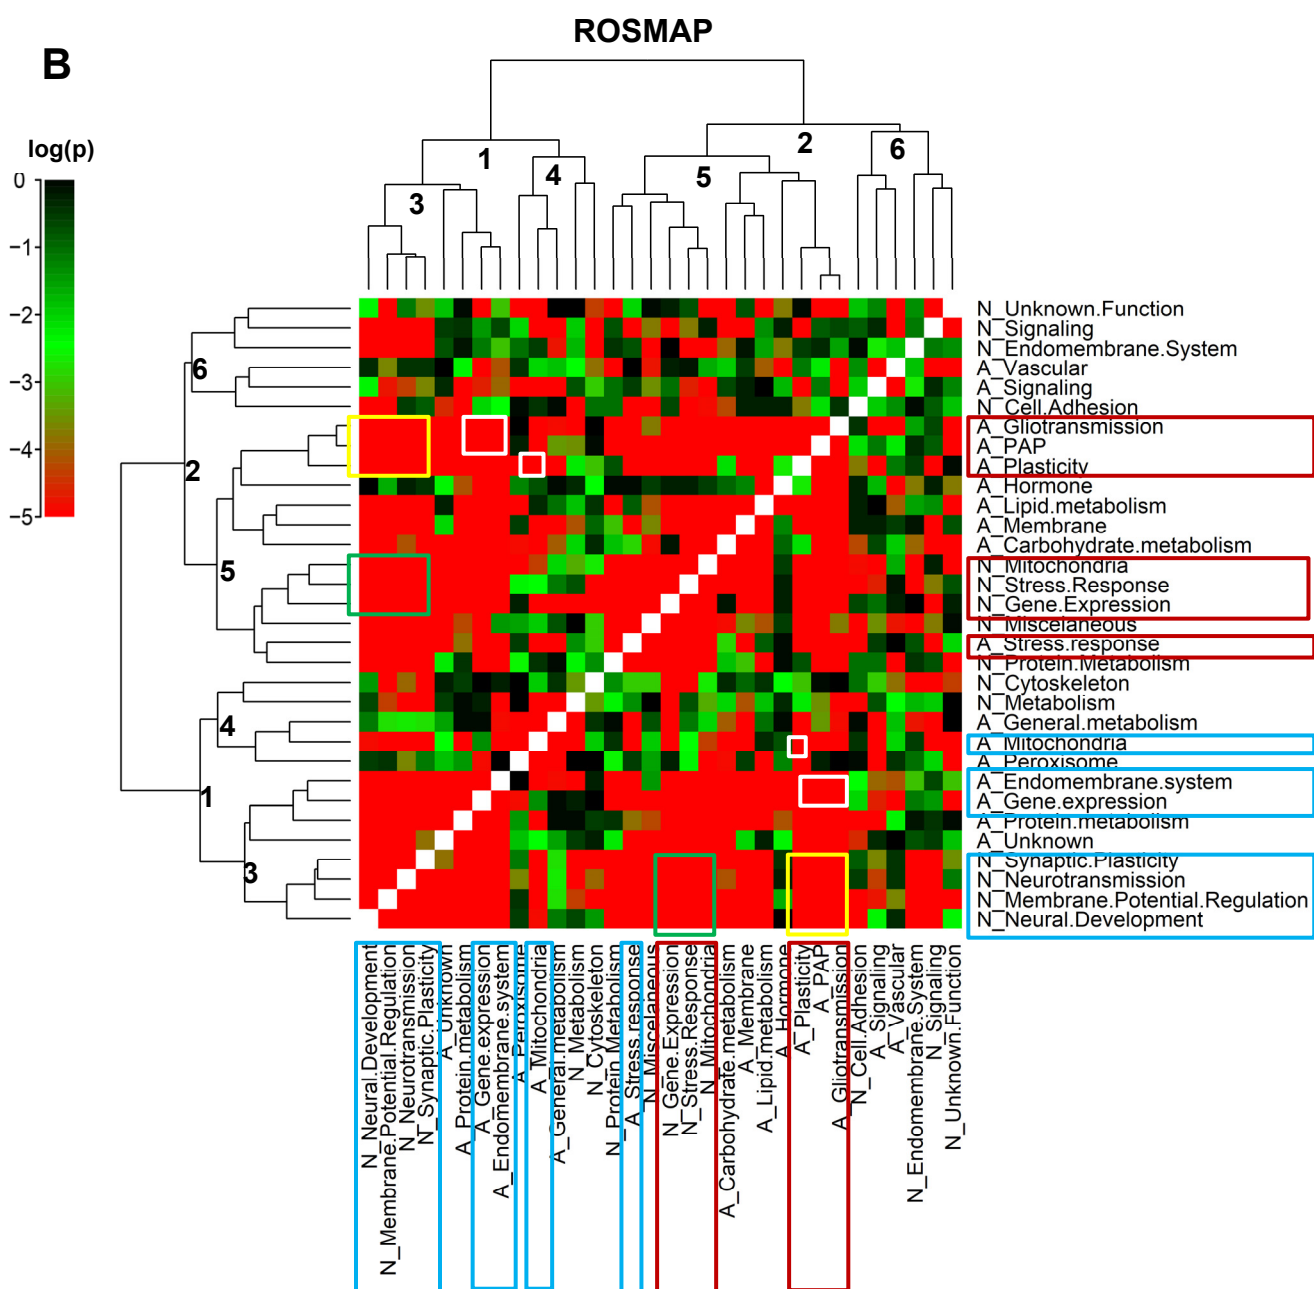

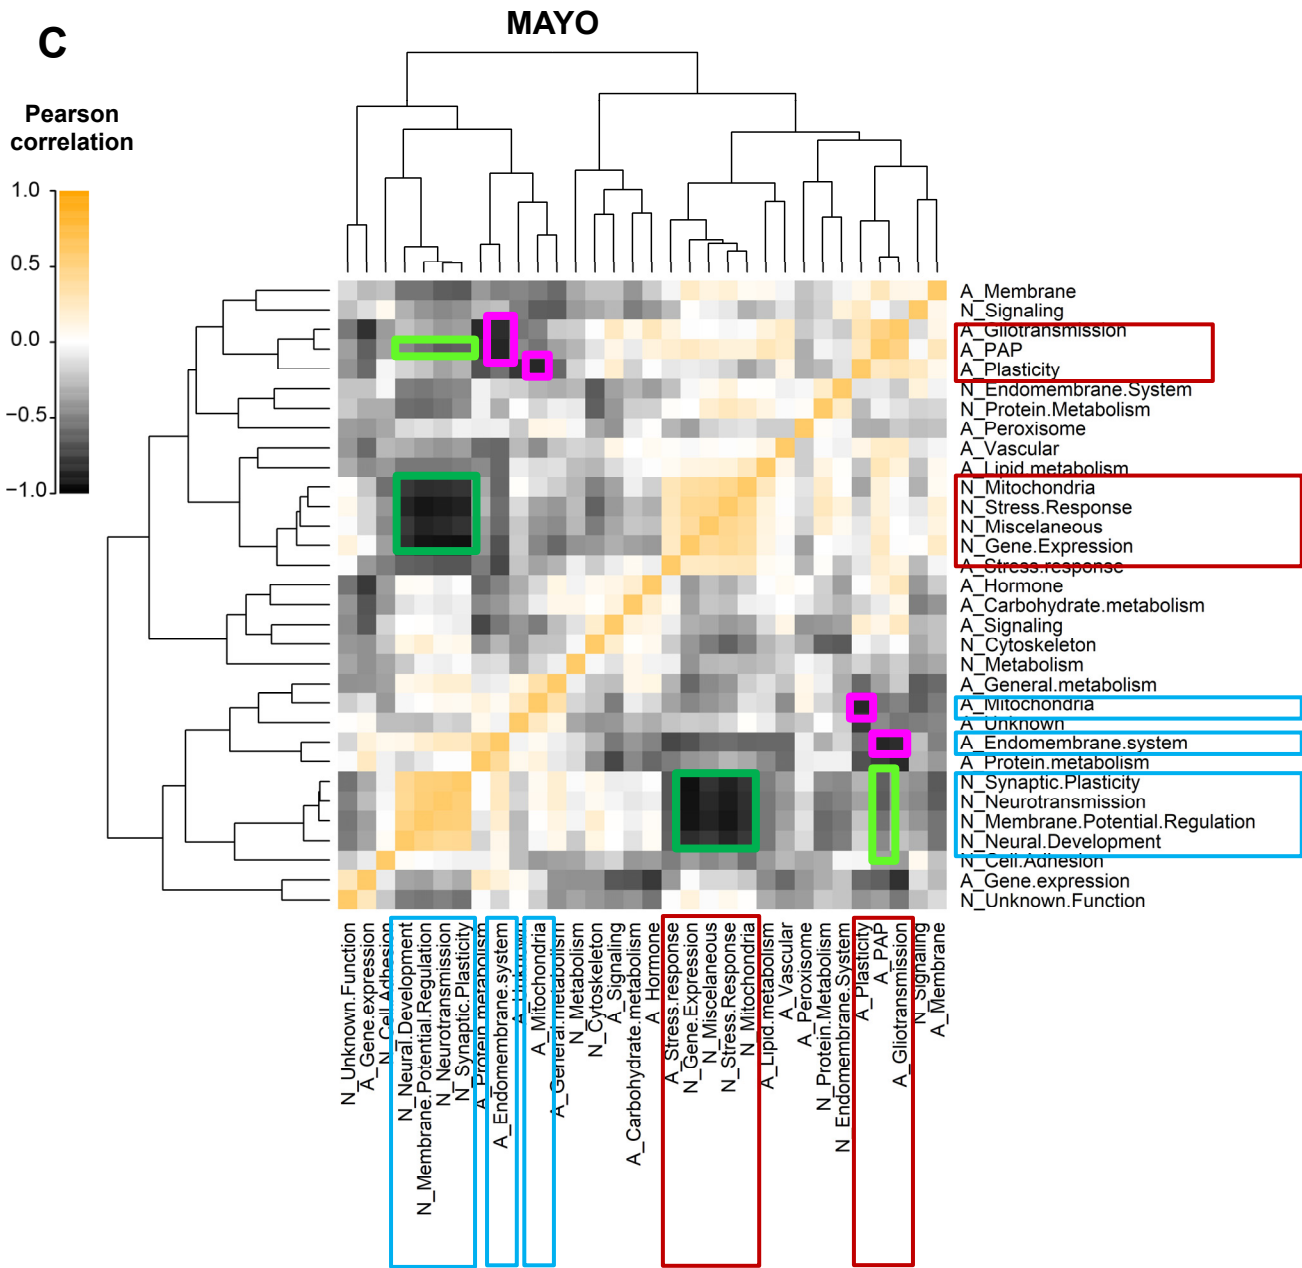

D

MAYO

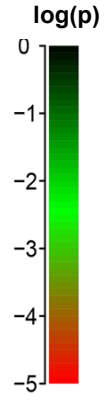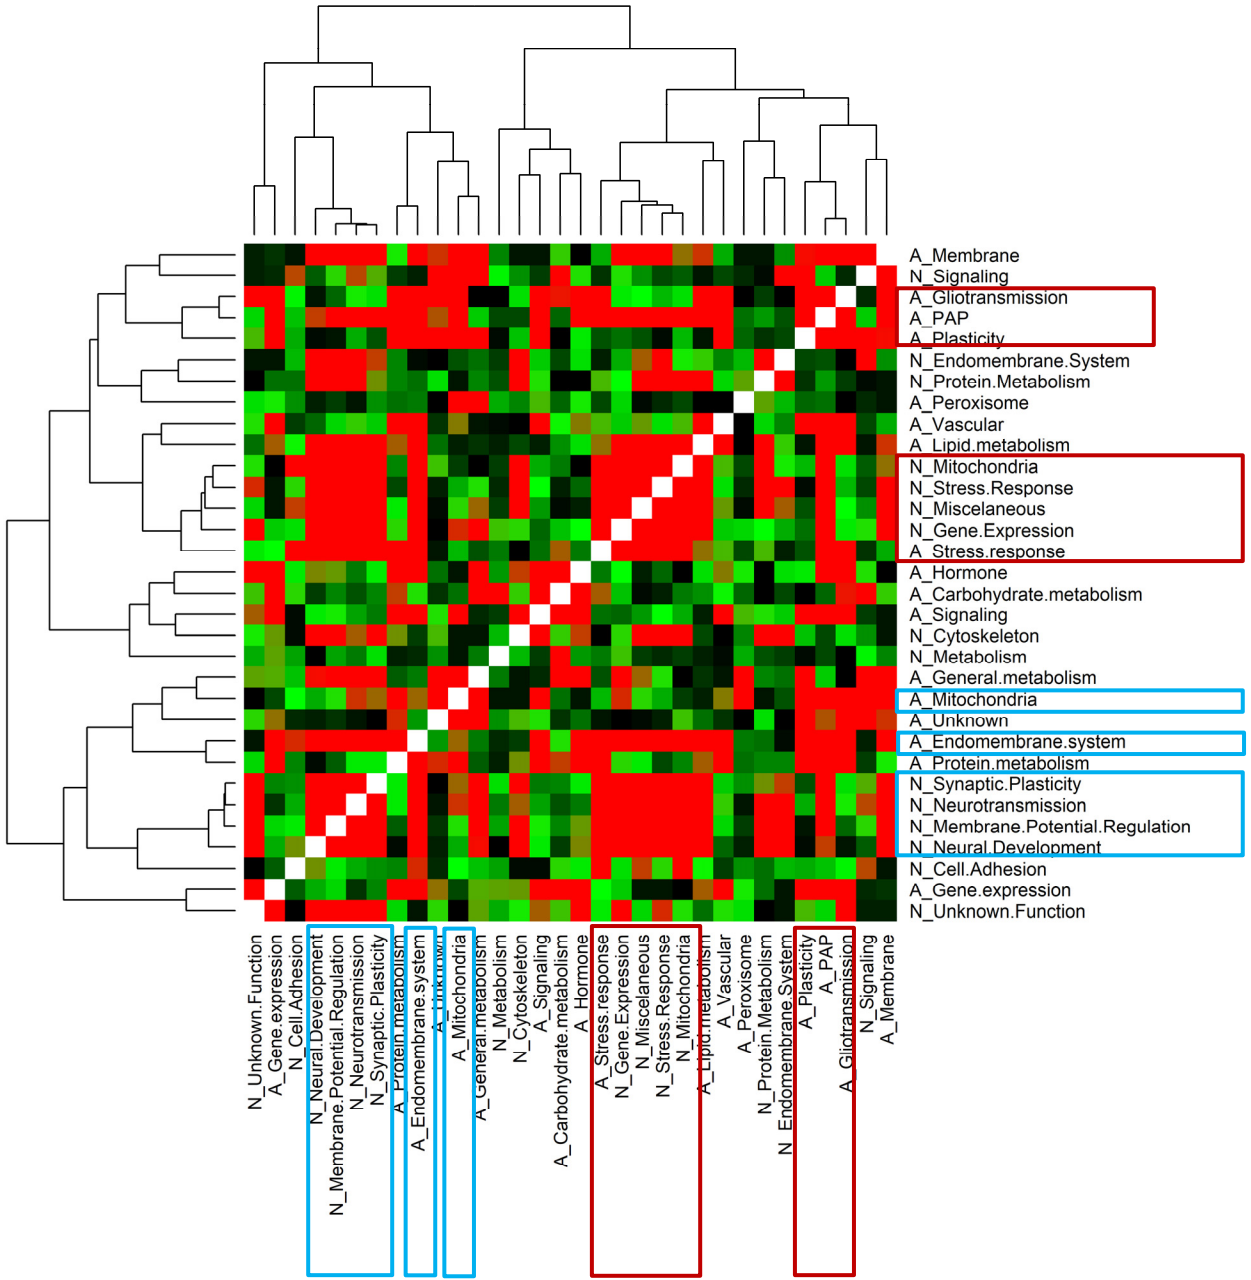

E

MtSINAI

Pearson correlation

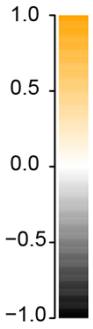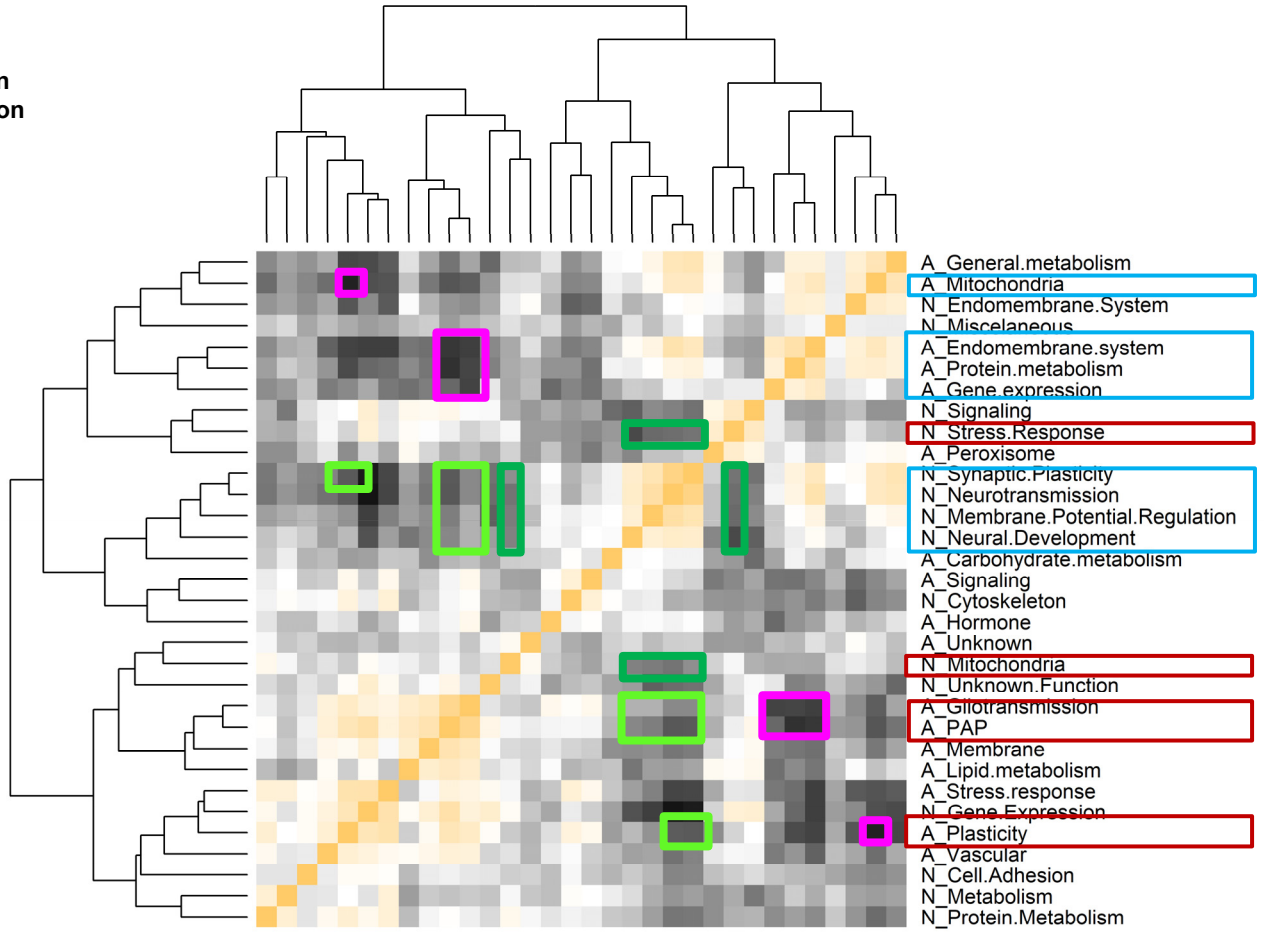

- N\_Protein.Metabolism
- N\_Metabolism
- N\_Cell.Adhesion
- N\_A\_Vascular
- A\_Plasticity
- N\_Gene.Expression
- A\_Stress.response
- A\_Lipid.metabolism
- A\_Membrane
- A\_PAP
- A\_Gliotransmission
- N\_Unknown.Function
- N\_Mitochondria
- A\_Unknown
- A\_Hormone
- N\_Cytoskeleton
- N\_A\_Signaling
- A\_Carbohydrate.metabolism
- N\_Neural.Development
- N\_Membrane.Potential.Regulation
- N\_Neurotransmission
- N\_Synaptic.Plasticity
- A\_Peroxisome
- N\_Stress.Response
- N\_Signaling
- A\_Gene.expression
- A\_Protein.metabolism
- A\_Endomembrane.system
- N\_Miscellaneous
- N\_Endomembrane.System
- A\_Mitochondria
- A\_General.metabolism

- A\_General.metabolism
- A\_Mitochondria
- N\_Endomembrane.System
- N\_Miscellaneous
- A\_Endomembrane.system
- A\_Protein.metabolism
- A\_Gene.expression
- N\_Signaling
- N\_Stress.Response
- A\_Peroxisome
- N\_Synaptic.Plasticity
- N\_Neurotransmission
- N\_Membrane.Potential.Regulation
- N\_Neural.Development
- A\_Carbohydrate.metabolism
- A\_Signaling
- N\_Cytoskeleton
- A\_Hormone
- A\_Unknown
- N\_Mitochondria
- N\_Unknown.Function
- A\_Gliotransmission
- A\_PAP
- A\_Membrane
- A\_Lipid.metabolism
- A\_Stress.response
- N\_Gene.Expression
- A\_Plasticity
- A\_Vascular
- N\_Cell.Adhesion
- N\_Metabolism
- N\_Protein.Metabolism

F

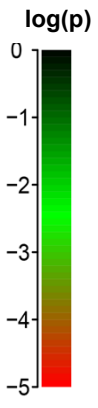

MtSINAI

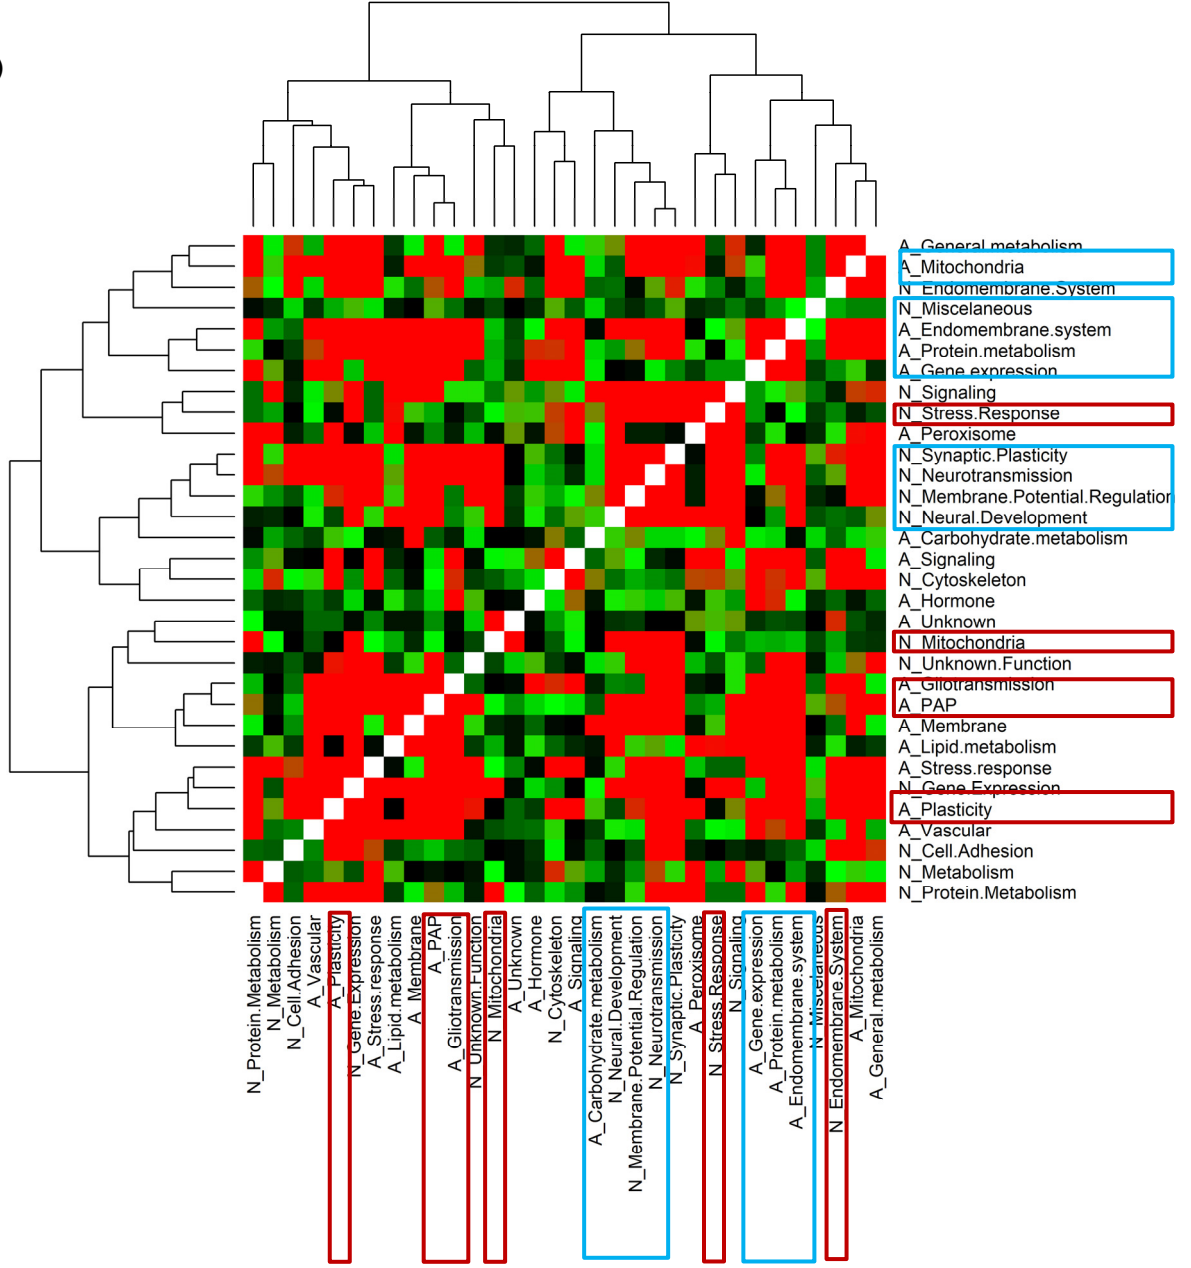

Supplement: Supplementary file [file media-9.pdf]
