# Supplementary material for: Multi-transcriptomic analysis points to early organelle dysfunction in human astrocytes in Alzheimer’s disease
Source: bioRxiv or medRxiv preprint supplement (doi:10.1101/2021.02.25.21252422), 2021-07-30

**A**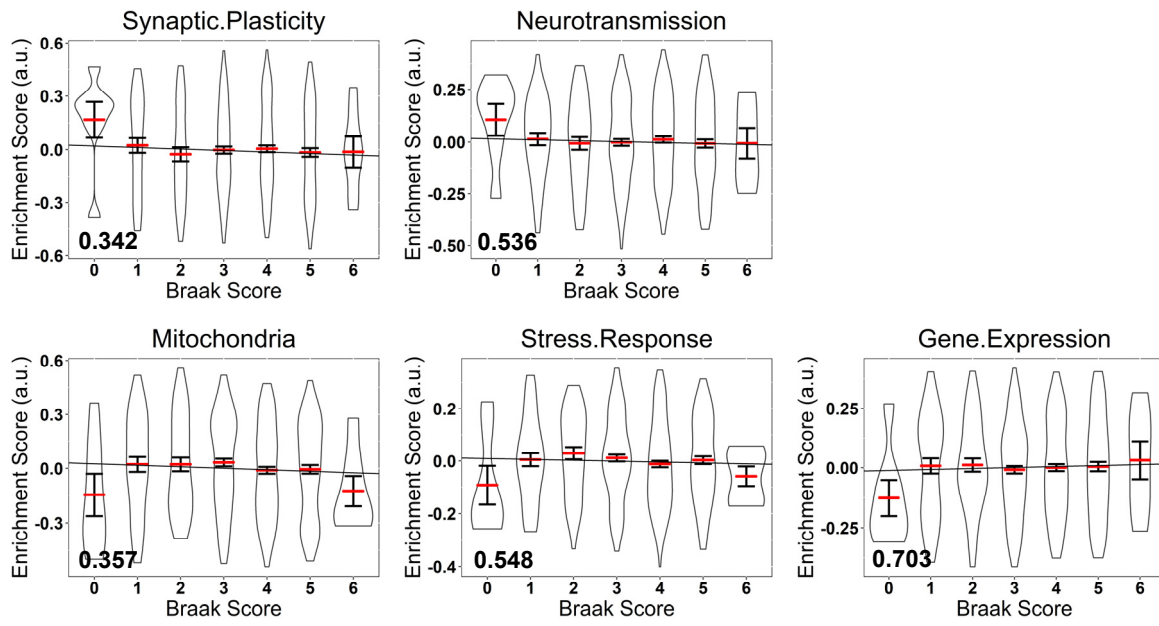**B**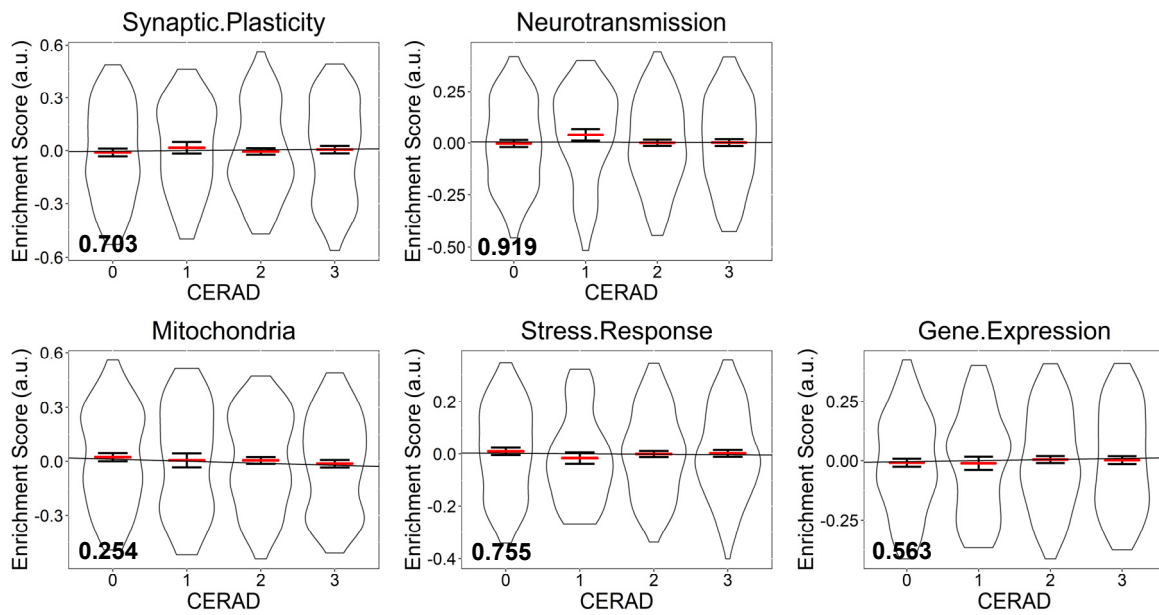

Supplement: Supplementary file [file media-7.pdf]
